# Supplementary material
Source: publisher figshare collection journal article supplement (https://tandf.figshare.com/ndownloader/files/23209283)
Supplement: Supplementary file 1 [file 23209283]

**Identification of Bioactive Compounds from *Glycyrrhiza glabra* as Possible Inhibitor of SARS-CoV-2 Spike Glycoprotein and Non-structural Protein-15: A Pharmacoinformatics Study**

***Supplementary data***

**Table S1.** Binding energies of docked compounds with the active site of spike glycoprotein (PDB Code: 6VSB) and Nsp15 endoribonuclease (PDB Code: 6W01) of SARS-CoV-2, respectively.

| **S.No.** | **PubChem CID** | **Name** | **Binding energy (Kcal/mol)** | |
| --- | --- | --- | --- | --- |
| **6VSB** | **6W01** |
| **1** | 5318998 | Licochalcone A | -6.5 | -6.7 |
| **2** | 5318999 | Licochalcone B | -6.5 | -7.8 |
| **3** | 9840805 | Licochalcone C | -6.6 | -7.4 |
| **4** | 10473311 | Licochalcone D | -7.1 | -8.3 |
| **5** | 46209991 | Licochalcone E | -7.0 | -6.6 |
| **6** | 44130137 | Licochalcone F | -6.9 | -7.3 |
| **7** | 49856081 | Licochalcone G | -6.4 | -7.6 |
| **8** | 14982 | Glycyrrhizic acid | -9.2 | -8.3 |
| **9** | 5481963 | Glyasperin A | -7.9 | -9.2 |
| **10** | 480784 | Glyasperin B | -7.0 | -8.1 |
| **11** | 480859 | Glyasperin C | -6.5 | -8.1 |
| **12** | 480860 | Glyasperin D | -6.8 | -8.0 |
| **13** | 6442433 | Isoliquiritinapioside | -7.4 | -9.0 |
| **14** | 480873 | 1-Methoxyphaseollidin | -7.0 | -7.9 |
| **15** | 480775 | Dehydroglyasperin C | -6.9 | -8.4 |
| **16** | 11253965 | Kanzonol Q | -6.2 | -6.8 |
| **17** | 503737 | Liquiritin | -7.7 | -8.8 |
| **18** | 11558452 | Hedysarimcoumestan B | -7.1 | -8.2 |
| **19** | 5321849 | 5,6,7,8-Tetrahydro-2,4-dimethylquinoline | -5.4 | -6.1 |
| **20** | 185667 | 5,6,7,8-Tetrahydro-4-methylquinoline | -4.9 | -5.9 |
| **21** | 92727 | Lopinavir | -7.4 | -8.3 |
| **22** | 37542 | Ribavirin | -5.6 | -6.6 |
